# Supplementary material for: Mediterranean diet adherence and risk of colorectal cancer: the prospective Netherlands Cohort Study
Source: Springer Nature journal article supplement (doi:10.1007/s10654-019-00549-8), 2019-09-07
Supplement: MOESM1 [file 17148738]

**Mediterranean diet adherence and risk of colorectal cancer: the prospective Netherlands Cohort Study**

European Journal of Epidemiology

Maya Schulpen, Piet A. van den Brandt

Corresponding author: Piet A. van den Brandt, Department of Epidemiology, Maastricht University Medical Centre, P.O. Box 616, 6200 MD Maastricht, the Netherlands. E-mail: pa.vandenbrandt@maastrichtuniversity.nl

**Online Resource 1** Age-adjusted associations of aMEDr with colorectal cancer risk for men and women in the Netherlands Cohort Study

|                       | PY <sub>subcohort</sub> | Colorectum |                          | Colon |                          | Proximal colon |                          | Distal colon |                          | Rectum |                          |
|-----------------------|-------------------------|------------|--------------------------|-------|--------------------------|----------------|--------------------------|--------------|--------------------------|--------|--------------------------|
|                       |                         | Cases      | HR (95% CI) <sup>a</sup> | Cases | HR (95% CI) <sup>a</sup> | Cases          | HR (95% CI) <sup>a</sup> | Cases        | HR (95% CI) <sup>a</sup> | Cases  | HR (95% CI) <sup>a</sup> |
| <i>Men</i>            |                         |            |                          |       |                          |                |                          |              |                          |        |                          |
| aMEDr                 |                         |            |                          |       |                          |                |                          |              |                          |        |                          |
| 0-3                   | 11788                   | 779        | 1.00                     | 507   | 1.00                     | 232            | 1.00                     | 256          | 1.00                     | 178    | 1.00                     |
| 4-5                   | 12448                   | 873        | 1.06 (0.92 - 1.23)       | 566   | 1.06 (0.90 - 1.24)       | 244            | 1.00 (0.81 - 1.23)       | 307          | 1.13 (0.93 - 1.38)       | 218    | 1.16 (0.93 - 1.45)       |
| 6-8                   | 4710                    | 341        | 1.07 (0.88 - 1.29)       | 223   | 1.07 (0.86 - 1.32)       | 113            | 1.17 (0.89 - 1.53)       | 105          | 1.00 (0.76 - 1.31)       | 79     | 1.09 (0.81 - 1.48)       |
| P <sub>trend</sub>    |                         |            | 0.497                    |       | 0.544                    |                | 0.265                    |              | 0.927                    |        | 0.513                    |
| Continuous, per 2 pts | 28946                   | 1993       | 1.04 (0.96 - 1.13)       | 1296  | 1.04 (0.95 - 1.14)       | 589            | 1.07 (0.95 - 1.20)       | 668          | 1.03 (0.92 - 1.15)       | 475    | 1.08 (0.96 - 1.23)       |
| <i>Women</i>          |                         |            |                          |       |                          |                |                          |              |                          |        |                          |
| aMEDr                 |                         |            |                          |       |                          |                |                          |              |                          |        |                          |
| 0-3                   | 12149                   | 619        | 1.00                     | 460   | 1.00                     | 274            | 1.00                     | 173          | 1.00                     | 117    | 1.00                     |
| 4-5                   | 14963                   | 656        | 0.87 (0.75 - 1.02)       | 498   | 0.89 (0.76 - 1.05)       | 284            | 0.86 (0.70 - 1.04)       | 201          | 0.95 (0.76 - 1.19)       | 113    | 0.79 (0.60 - 1.05)       |
| 6-8                   | 6207                    | 299        | 0.97 (0.80 - 1.18)       | 229   | 1.00 (0.81 - 1.24)       | 145            | 1.08 (0.84 - 1.38)       | 78           | 0.90 (0.66 - 1.21)       | 47     | 0.81 (0.56 - 1.16)       |
| P <sub>trend</sub>    |                         |            | 0.781                    |       | 0.969                    |                | 0.547                    |              | 0.474                    |        | 0.244                    |
| Continuous, per 2 pts | 33318                   | 1574       | 0.96 (0.88 - 1.05)       | 1187  | 0.98 (0.89 - 1.08)       | 703            | 1.01 (0.89 - 1.13)       | 452          | 0.96 (0.84 - 1.10)       | 277    | 0.88 (0.74 - 1.04)       |

aMEDr alternate Mediterranean diet score without the alcohol component, PY<sub>subcohort</sub> person-years in the subcohort

<sup>a</sup>Adjusted for age at baseline (years)
